# Supplementary material
Source: publisher site journal article supplement (https://www.spandidos-publications.com/3513/downloadSupplementary)
Supplement: Supplementary file 1 [file downloadSupplementary]

Table S1. Basic patients' information.

| Group         | Sex    | Age,<br>years | Complications |
|---------------|--------|---------------|---------------|
| DEX group     | Male   | 60            | No            |
|               | Male   | 39            | No            |
|               | Male   | 33            | No            |
|               | Male   | 42            | No            |
|               | Male   | 55            | No            |
|               | Male   | 36            | No            |
|               | Male   | 43            | No            |
|               | Male   | 35            | No            |
|               | Male   | 36            | No            |
|               | Male   | 39            | No            |
|               | Male   | 48            | No            |
|               | Male   | 40            | No            |
|               | Female | 52            | No            |
|               | Female | 37            | No            |
|               | Female | 41            | No            |
|               | Female | 34            | No            |
|               | Female | 40            | No            |
|               | Female | 38            | No            |
|               | Female | 35            | No            |
|               | Female | 33            | No            |
| Control group | Male   | 33            | No            |
|               | Male   | 31            | No            |
|               | Male   | 56            | No            |
|               | Male   | 61            | No            |
|               | Male   | 51            | No            |
|               | Male   | 40            | No            |
|               | Male   | 33            | No            |
|               | Male   | 42            | No            |
|               | Male   | 42            | No            |
|               | Male   | 49            | No            |
|               | Male   | 36            | No            |
|               | Male   | 46            | No            |
|               | Male   | 35            | No            |
|               | Female | 34            | No            |
|               | Female | 32            | No            |
|               | Female | 42            | No            |
|               | Female | 46            | No            |
|               | Female | 52            | No            |
|               | Female | 46            | No            |
|               | Female | 31            | No            |
